# Supplementary material for: Theoretical tuning of Ruddlesden–Popper type anti-perovskite phases as superb ion conductors and cathodes for solid sodium ion batteries
Source: Royal Society of Chemistry journal article supplement (doi:10.1039/c9ta02166c), 2019-01-01
Supplement: c9ta02166c1.pdf [file c9ta02166c1.pdf]

## Electronic Supporting Materials

### S1. AIMD calculations:

The diffusion coefficient is related to the average mean square displacement (MSD) from molecular dynamics (MD) runs at each temperature  $T$  over a period of time ( $t$ ),  $\langle[\Delta\mathbf{r}(t)]^2\rangle$ , as

$$D = \frac{1}{2dt} \langle[\Delta\mathbf{r}(t)]^2\rangle,$$

where  $d$  is the dimensionality factor. Using the Arrhenius relation,  $D = D_0 \exp(-\frac{E_a}{k_B T})$ , one can

derive  $D_0$  and  $E_a$  via plotting the logarithmic values of  $D$  against  $1/T$ . Correction of the MSD from artefactual errors due to the periodic boundary condition is necessary for dependable AIMD evaluation of  $D$ , using the “unwrapped” trajectories to help achieve significant improvement in sampling statistics from limited simulation data typical for tractable AIMD runs.<sup>1-5</sup>

The ionic conductivity  $\sigma$  can then be derived using the Nernst–Einstein equation,<sup>3,6</sup>

$$\sigma = \frac{\rho z^2 F^2}{RT} D = \frac{\rho z^2 F^2}{RT} D_0 \exp(-\frac{E_a}{k_B T})$$

where  $\rho$  is the molar density of diffusing alkali ions in the unit cell,  $z$  is the charge of alkali ions (+1 for  $\text{Na}^+$ ),  $F$  and  $R$  are the Faraday’s constant and the gas constant, respectively,  $D_0$  is a constant,  $E_a$  is activation energy for diffusion, and  $k_B$  is the Boltzmann constant. The ionic conductivity is thus dictated by the diffusion process.

### S2. Quasi-harmonic approximation in Gibbs free energy:

Gibbs free energy ( $G$ ) of all phases belonging to the given compounds can be expressed as:

$$G = H - TS = E + pV - TS,$$

where  $H$ ,  $E$ ,  $p$ ,  $V$ ,  $T$ , and  $S$  represent the enthalpy, internal energy, pressure, volume, and entropy of the system, correspondingly.

Quasi-harmonic approximation is used for an approximation that introduces volume dependence of phonon frequencies as a part of anharmonic effect. A part of temperature effect can be included into total energy of electronic structure through phonon (Helmholtz) free energy at constant volume. Defined at a constant pressure by the transformation, Gibbs free energy can be expressed as:

$$G(T, P) = \min_V [U(V) + F_{\text{phonon}}(T; V) + pV],$$

where

$$\min_V [\text{function of } V]$$

which means to find unique minimum value in the brackets by changing volume. By increasing temperature, the volume dependence of phonon free energy changes, then the equilibrium volume at temperatures changes. This is considered as thermal expansion under this approximation.

Formation energy for Na vacancy:

The formation energies of a Na vacancy in  $\text{Na}_4\text{S}_{0.5}\text{O}_{0.5}\text{I}_2$  and  $\text{Na}_3\text{LiS}_{0.5}\text{O}_{0.5}\text{I}_2$  are defined as

$$\begin{aligned} \Delta E_1 &= E_{\text{Na}_4\text{S}_{0.5}\text{O}_{0.5}\text{I}_2\text{vac}} - (E_{\text{Na}_4\text{S}_{0.5}\text{O}_{0.5}\text{I}_2} - \mu_{\text{Na}}), \\ \Delta E_2 &= E_{\text{Na}_3\text{Li}_{0.5}\text{S}_{0.5}\text{O}_{0.5}\text{I}_2\text{vac}} - (E_{\text{Na}_3\text{LiS}_{0.5}\text{O}_{0.5}\text{I}_2} - \mu_{\text{Na}}). \end{aligned}$$

where  $\mu_{Na}$  is the chemical potential of Na (-1.31 eV). The calculated formation energies  $\Delta E_1$  and  $\Delta E_2$  are quite small (only around 0.013 eV/atom), indicating statistical readiness for the presence of vacancies in the materials due to energetic fluctuation (noticing that the thermal energy at room temperature is already about 0.025 eV).

Reference:

1. Y. Yu, Z. Wang and G. Shao, *J. Mater. Chem. A*, 2018, **6**, 19843-19852.
2. Z. Wang, H. Xu, M. Xuan and G. Shao, *J. Mater. Chem. A*, 2018, **6**, 73-83.
3. Z. Wang and G. Shao, *J. Mater. Chem. A*, 2017, **5**, 21846-21857.
4. H. Xu, Y. Yu, Z. Wang and G. Shao, *J. Mater. Chem. A*, 2019, **7**, 5239-5247.
5. M. V. Agnihotri, S. H. Chen, C. Beck and S. J. Singer, *J. Phys. Chem. B*, 2014, **118**, 8170-8178.
6. J. C. Bachman, S. Muy, A. Grimaud, H. H. Chang, N. Pour, S. F. Lux, O. Paschos, F. Maglia, S. Lupart, P. Lamp, L. Giordano and Y. Shao-Horn, *Chem. Rev.*, 2016, **116**, 140-162.

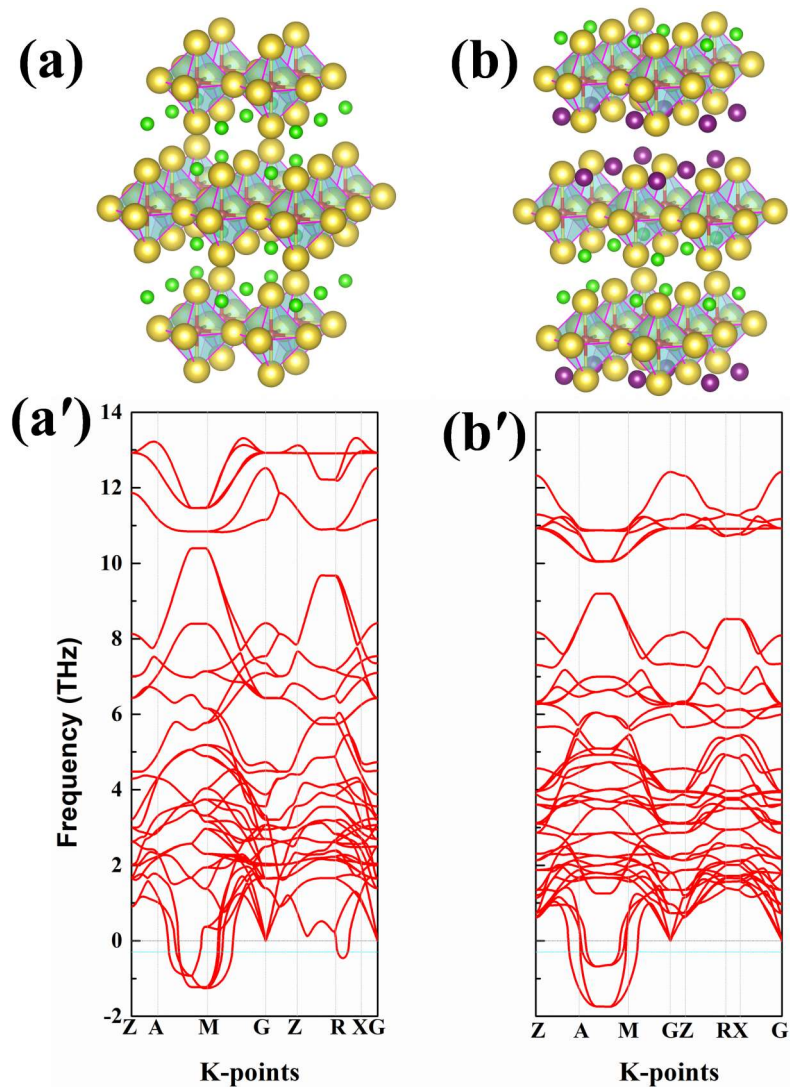

Fig. S1 Low-energy structures from USPEX global searching for (a) $\text{Na}_4\text{OCl}_2_{139}$  and (b) $\text{Na}_4\text{OICl}_{129}$ . The associated phonon band structures are displayed in (a') and (b'), respectively.

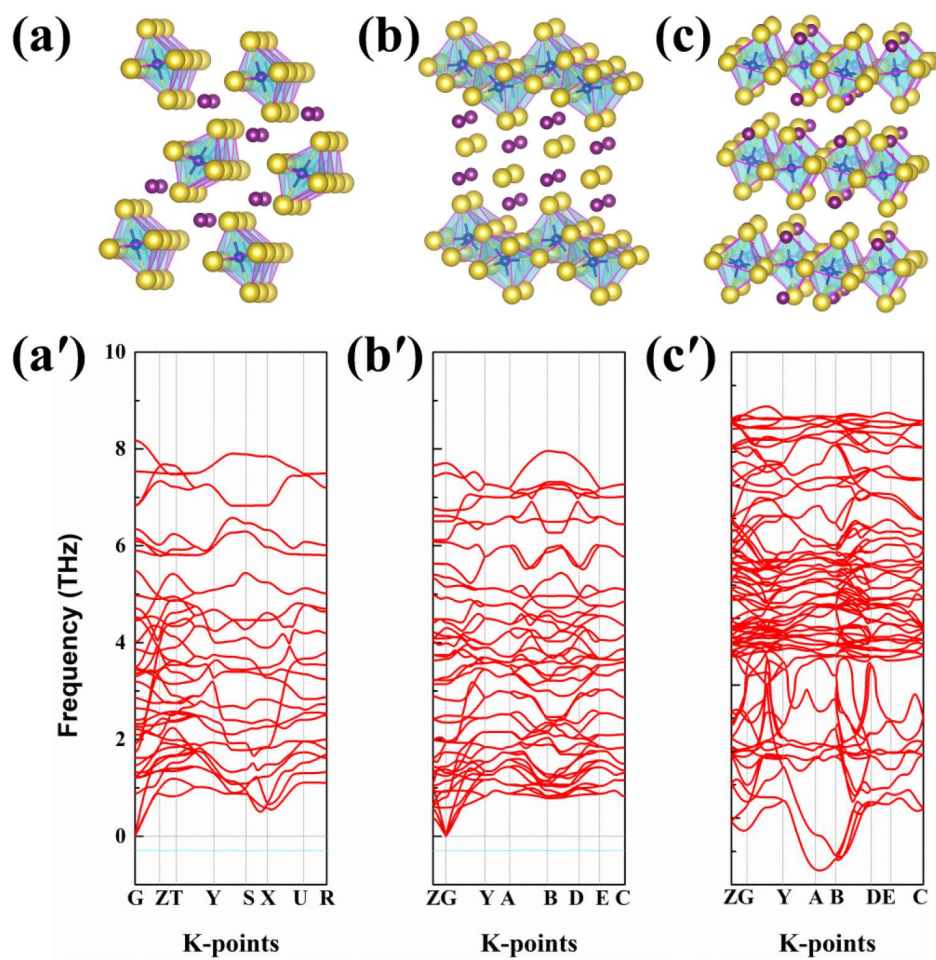

Fig. S2 Low energy structures from USPEX global searching for (a)Na<sub>4</sub>Si<sub>2</sub>\_55, (b)Na<sub>4</sub>Si<sub>2</sub>\_11 and (c)Na<sub>4</sub>Si<sub>2</sub>\_64. The calculated phonon band structures are displayed in (a')-(c'), correspondingly.

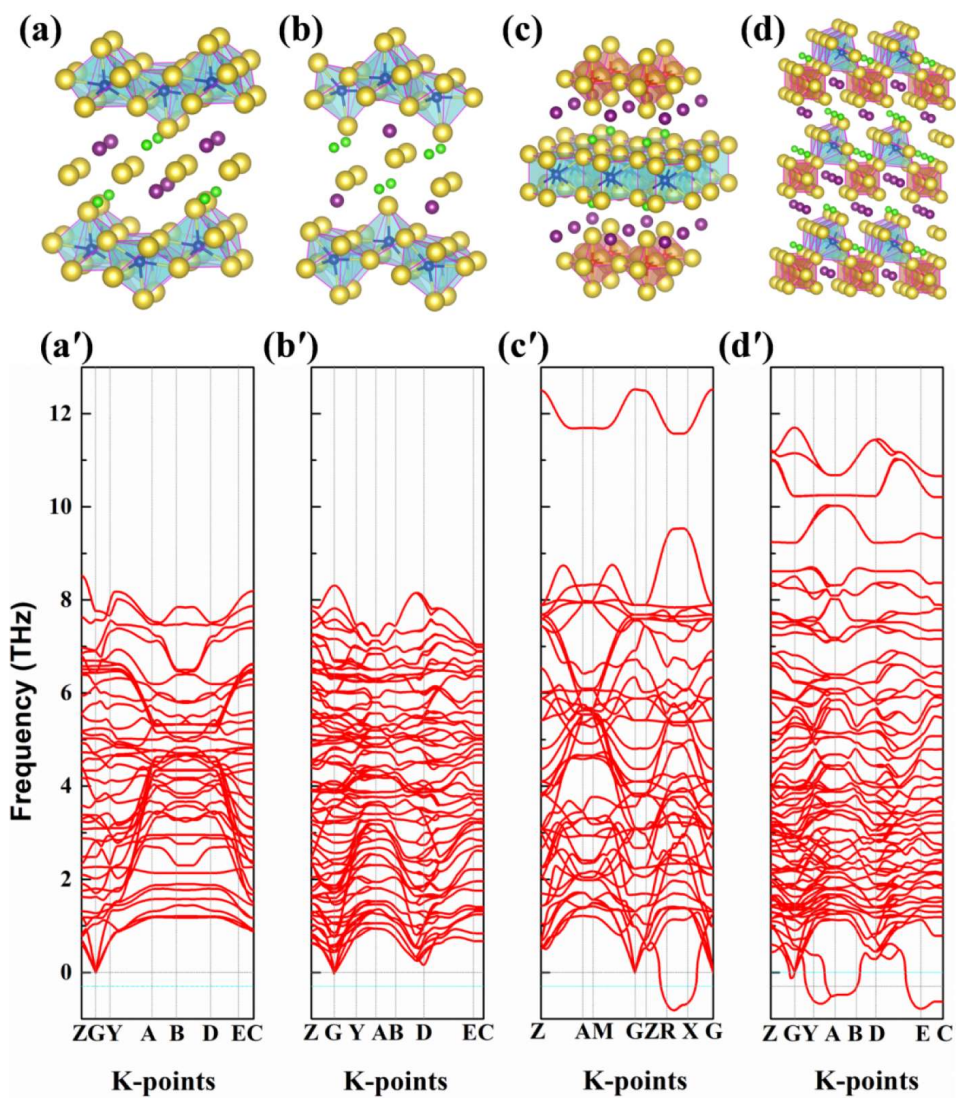

Fig. S3 The low-energy structures obtained from USPEX global searching for (a)Na<sub>4</sub>SICl<sub>12</sub>, (b)Na<sub>4</sub>SICl<sub>8</sub>, (c)Na<sub>4</sub>S<sub>0.5</sub>O<sub>0.5</sub>ICl<sub>123</sub>, (d)Na<sub>4</sub>S<sub>0.5</sub>O<sub>0.5</sub>ICl<sub>8</sub>. The corresponding calculated phonon band structures are displayed in (a')-(d').

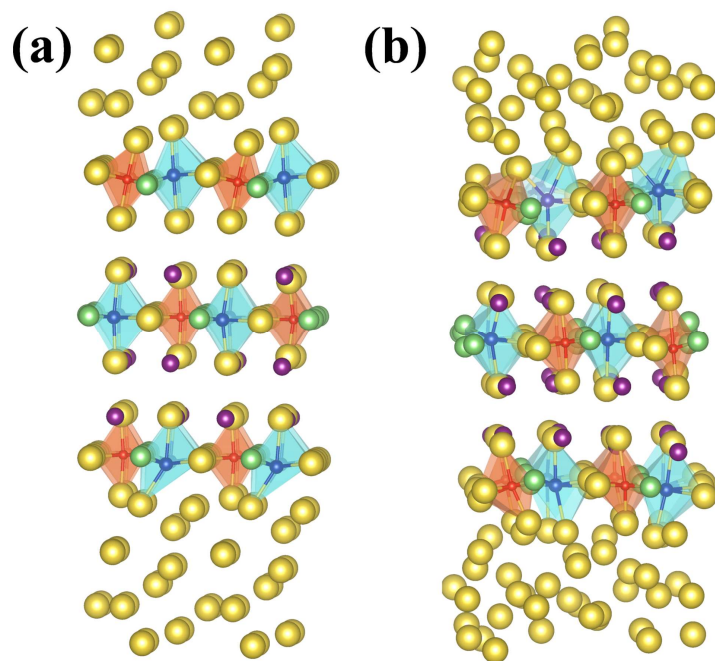

Fig. S4 Sandwich model of  $\text{Na}[\text{Na}_3\text{LiS}_{0.5}\text{O}_{0.5}\text{I}_2]\text{Na}$ : (a) before and (b) after AIMD simulation at 500 K.

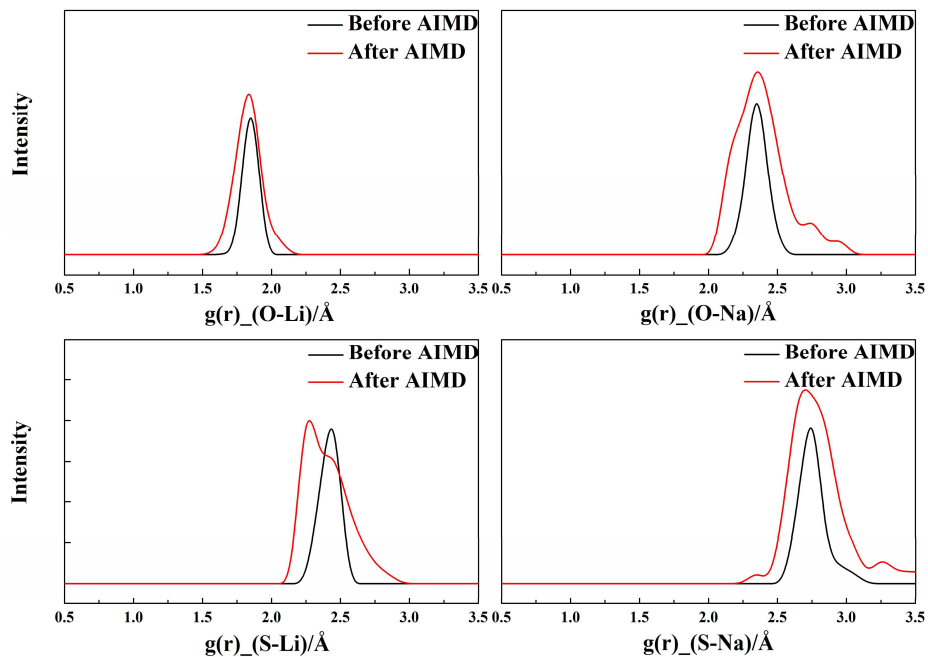

Fig. S5 Pair correlation functions (PCFs) for (a) O-Li, (b) O-Na, (c) S-Li and (d) S-Na bonds after AIMD simulation at 500 K.

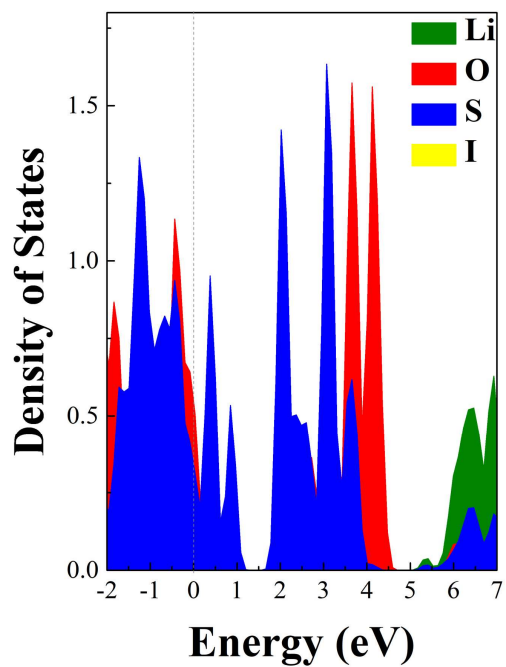

Fig. S6 Projected density of states for  $\text{LiS}_{0.5}\text{O}_{0.5}\text{I}_2$ .

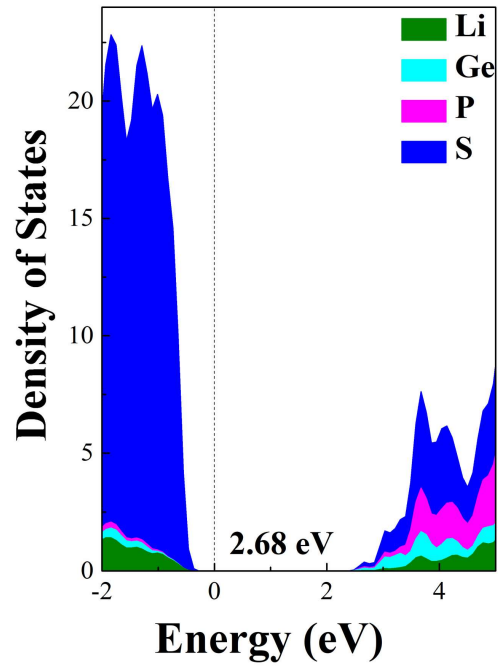

Fig. S7 The projected density of states for LGPS.

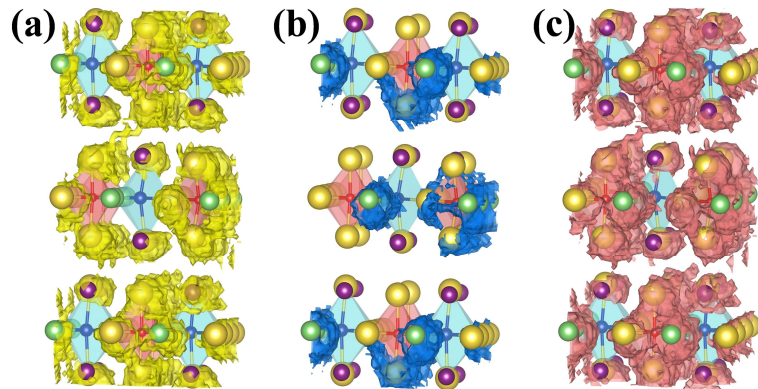

Fig. S8 (a) Na<sup>+</sup>, (b) Li<sup>+</sup> and (c) the overall Na<sup>+</sup>/Li<sup>+</sup> ion trajectories at 1000 K for Na<sub>3</sub>LiS<sub>0.5</sub>O<sub>0.5</sub>I<sub>2</sub>.



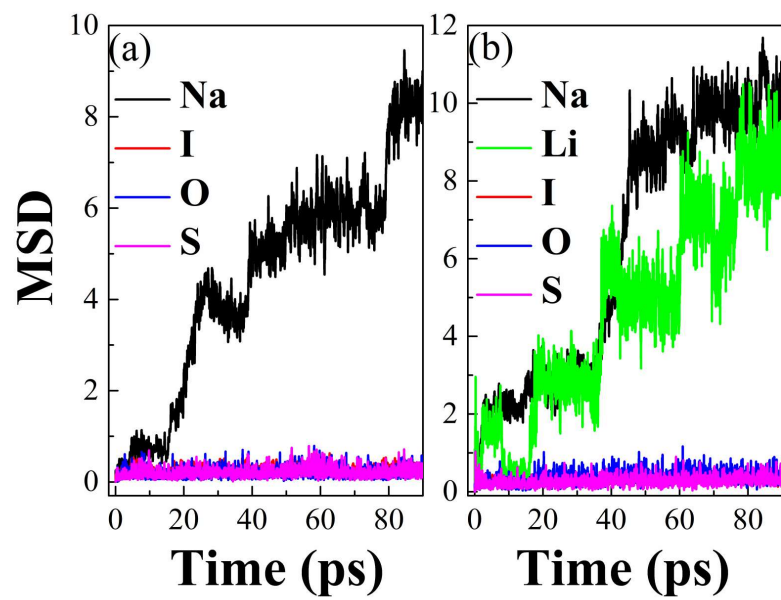

Fig. S9 Evolution of MSD for  $\text{Na}_4\text{S}_{0.5}\text{O}_{0.5}\text{I}_2$  and  $\text{Na}_3\text{LiS}_{0.5}\text{O}_{0.5}\text{I}_2$  at 1100 K, exhibiting long-range diffusion of alkali ions.

Table S1 Summary of potential candidates. The formation energy at 0 K (eV/atom) and critical temperature ( $T_c$ ) to avoid phase decomposition into constituent compounds.

| <b>Compounds</b>                                                    | <b>USPEX</b> | <b>Phonon</b> | <b>Formation Energy</b> | <b><math>T_c</math></b> |
|---------------------------------------------------------------------|--------------|---------------|-------------------------|-------------------------|
| <b>Na<sub>4</sub>OI<sub>2</sub>_139</b>                             | √            | <b>stable</b> | <b>&lt;0</b>            | <b>&lt;438 K</b>        |
| Na <sub>4</sub> OCl <sub>2</sub> _139                               | √            | unstable      | <0                      | ×                       |
| <b>Na<sub>4</sub>OICl_63</b>                                        | √            | <b>stable</b> | <b>&lt;0</b>            | <b>&lt;826 K</b>        |
| Na <sub>4</sub> OICl_129                                            | √            | unstable      | <0                      | ×                       |
| <b>Na<sub>4</sub>S<sub>0.5</sub>O<sub>0.5</sub>I<sub>2</sub>_65</b> | √            | <b>stable</b> | <b>&lt;0.025</b>        | <b>&gt;140 K</b>        |
| Na <sub>4</sub> SI <sub>2</sub> _11                                 | √            | stable        | >0.025                  | ×                       |
| Na <sub>4</sub> SI <sub>2</sub> _55                                 | √            | stable        | >0.025                  | ×                       |
| Na <sub>4</sub> SI <sub>2</sub> _64                                 | √            | unstable      | >0.025                  | ×                       |
| Na <sub>4</sub> SICl_12                                             | √            | stable        | >0.025                  | ×                       |
| Na <sub>4</sub> SICl_8                                              | √            | stable        | >0.025                  | ×                       |
| Na <sub>4</sub> S <sub>0.5</sub> O <sub>0.5</sub> ICl_123           | √            | unstable      | >0.025                  | ×                       |
| Na <sub>4</sub> S <sub>0.5</sub> O <sub>0.5</sub> ICl_8             | √            | unstable      | >0.025                  | ×                       |

Table S2 Summary of High symmetry points in the Brillouin zone used in this paper.

| <b>High symmetry points</b> | <b>Coordinates</b> |
|-----------------------------|--------------------|
| G                           | (0.00 0.00 0.00)   |
| Z                           | (0.00 0.00 0.50)   |
| T                           | (-0.50 0.00 0.50)  |
| Y                           | (-0.50 0.00 0.00)  |
| S                           | (-0.50 0.50 0.00)  |
| X                           | (0.00 0.50 0.00)   |
| U                           | (0.00 0.50 0.50)   |
| R                           | (-0.50 0.50 0.50)  |
| A                           | (0.50 0.50 0.50)   |
| M                           | (0.50 0.50 0.00)   |
